# Supplementary material
Source: ML conference proceedings conference paper supplement (https://proceedings.mlr.press/v48/reddi16.html)
Supplement: Supplementary file 2 [file reddi16-supp.zip]

## Appendix: Stochastic Variance Reduction for Nonconvex Optimization

### A. Nonconvex SGD: Convergence Rate

#### Proof of Theorem 1

**Theorem.** Suppose  $f \in \mathcal{F}_n$  has  $\sigma$ -bounded gradients; let  $\eta_t = \eta = c/\sqrt{T}$  where  $c = \sqrt{\frac{2(f(x^0) - f(x^*))}{L\sigma^2}}$ , and  $x^*$  is an optimal solution to (1). Then, the iterates of SGD satisfy

$$\min_{0 \leq t \leq T-1} \mathbb{E}[\|\nabla f(x^t)\|^2] \leq \sqrt{\frac{2(f(x^0) - f(x^*))L}{T}} \sigma.$$

*Proof.* We include the proof here for completeness. Please refer to (Ghadimi & Lan, 2013) for a more general result.

The iterates of SGD satisfy the following bound:

$$\mathbb{E}[f(x^{t+1})] \leq \mathbb{E}[f(x^t) + \langle \nabla f(x^t), x^{t+1} - x^t \rangle + \frac{L}{2} \|x^{t+1} - x^t\|^2] \quad (4)$$

$$\begin{aligned} &\leq \mathbb{E}[f(x^t)] - \eta_t \mathbb{E}[\|\nabla f(x^t)\|^2] + \frac{L\eta_t^2}{2} \mathbb{E}[\|\nabla f_{i_t}(x^t)\|^2] \\ &\leq \mathbb{E}[f(x^t)] - \eta_t \mathbb{E}[\|\nabla f(x^t)\|^2] + \frac{L\eta_t^2}{2} \sigma^2. \end{aligned} \quad (5)$$

The first inequality follows from Lipschitz continuity of  $\nabla f$ . The second inequality follows from the update of SGD and since  $\mathbb{E}_{i_t}[\nabla f_{i_t}(x^t)] = \nabla f(x^t)$  (unbiasedness of the stochastic gradient). The last step uses our assumption on gradient boundedness. Rearranging Equation (5) we obtain

$$\mathbb{E}[\|\nabla f(x^t)\|^2] \leq \frac{1}{\eta_t} \mathbb{E}[f(x^t) - f(x^{t+1})] + \frac{L\eta_t}{2} \sigma^2. \quad (6)$$

Summing Equation (6) from  $t = 0$  to  $T - 1$  and using that  $\eta_t$  is fixed  $\eta$  we obtain

$$\begin{aligned} \min_t \mathbb{E}[\|\nabla f(x^t)\|^2] &\leq \frac{1}{T} \sum_{t=0}^{T-1} \mathbb{E}[\|f(x^t)\|^2] \\ &\leq \frac{1}{T\eta} \mathbb{E}[f(x^0) - f(x^T)] + \frac{L\eta}{2} \sigma^2 \\ &\leq \frac{1}{T\eta} (f(x^0) - f(x^*)) + \frac{L\eta}{2} \sigma^2 \\ &\leq \frac{1}{\sqrt{T}} \left( \frac{1}{c} (f(x^0) - f(x^*)) + \frac{Lc}{2} \sigma^2 \right). \end{aligned}$$

The first step holds because the minimum is less than the average. The second and third steps are obtained from Equation (6) and the fact that  $f(x^*) \leq f(x^T)$ , respectively. The final inequality follows upon using  $\eta = c/\sqrt{T}$ . By setting

$$c = \sqrt{\frac{2(f(x^0) - f(x^*))}{L\sigma^2}}$$

in the above inequality, we get the desired result.  $\square$

### B. Nonconvex SVRG

In this section, we provide the proofs of the results for nonconvex SVRG. We first start with few useful lemmas and then proceed towards the main results.

**Lemma 1.** Let  $f \in \mathcal{F}_n$ . For  $c_t, c_{t+1}, \beta_t > 0$ , suppose we have the following:

$$c_t = c_{t+1}(1 + \eta_t \beta_t + 2\eta_t^2 L^2) + \eta_t^2 L^3.$$

Let  $\eta_t, \beta_t$  and  $c_{t+1}$  be chosen such that  $\Gamma_t > 0$  (in Equation (3)). The iterate  $x_t^{s+1}$  in Alg. 1 satisfy the bound:

$$\mathbb{E}[\|\nabla f(x_t^{s+1})\|^2] \leq \frac{R_t^{s+1} - R_{t+1}^{s+1}}{\Gamma_t},$$

where  $R_t^{s+1} := \mathbb{E}[f(x_t^{s+1}) + c_t \|x_t^{s+1} - \tilde{x}^s\|^2]$  for all  $0 \leq s \leq S - 1$ .

*Proof.* Since  $f$  is  $L$ -smooth we have

$$\begin{aligned} \mathbb{E}[f(x_{t+1}^{s+1})] &\leq \mathbb{E}[f(x_t^{s+1}) + \langle \nabla f(x_t^{s+1}), x_{t+1}^{s+1} - x_t^{s+1} \rangle \\ &\quad + \frac{L}{2} \|x_{t+1}^{s+1} - x_t^{s+1}\|^2]. \end{aligned}$$

Using the SVRG update in Alg. 1 and its unbiasedness, the right hand side above is further upper bounded by

$$\mathbb{E}[f(x_t^{s+1}) - \eta_t \|\nabla f(x_t^{s+1})\|^2 + \frac{L\eta_t^2}{2} \|v_t^{s+1}\|^2]. \quad (7)$$

Consider now the Lyapunov function

$$R_t^{s+1} := \mathbb{E}[f(x_t^{s+1}) + c_t \|x_t^{s+1} - \tilde{x}^s\|^2].$$

For bounding it we will require the following:

$$\begin{aligned} \mathbb{E}[\|x_{t+1}^{s+1} - \tilde{x}^s\|^2] &= \mathbb{E}[\|x_{t+1}^{s+1} - x_t^{s+1} + x_t^{s+1} - \tilde{x}^s\|^2] \\ &= \mathbb{E}[\|x_{t+1}^{s+1} - x_t^{s+1}\|^2 + \|x_t^{s+1} - \tilde{x}^s\|^2 \\ &\quad + 2\langle x_{t+1}^{s+1} - x_t^{s+1}, x_t^{s+1} - \tilde{x}^s \rangle] \\ &= \mathbb{E}[\eta_t^2 \|v_t^{s+1}\|^2 + \|x_t^{s+1} - \tilde{x}^s\|^2 \\ &\quad - 2\eta_t \mathbb{E}[\langle \nabla f(x_t^{s+1}), x_t^{s+1} - \tilde{x}^s \rangle]] \\ &\leq \mathbb{E}[\eta_t^2 \|v_t^{s+1}\|^2 + \|x_t^{s+1} - \tilde{x}^s\|^2] \\ &\quad + 2\eta_t \mathbb{E} \left[ \frac{1}{2\beta_t} \|\nabla f(x_t^{s+1})\|^2 + \frac{1}{2}\beta_t \|x_t^{s+1} - \tilde{x}^s\|^2 \right]. \end{aligned} \quad (8)$$

The second equality follows from the unbiasedness of the update of SVRG. The last inequality follows from a simple application of Cauchy-Schwarz and Young's inequality. Plugging Equation (7) and Equation (8) into  $R_{t+1}^{s+1}$ , we obtain the following bound:

$$\begin{aligned} R_{t+1}^{s+1} &\leq \mathbb{E}[f(x_t^{s+1}) - \eta_t \|\nabla f(x_t^{s+1})\|^2 + \frac{L\eta_t^2}{2} \|v_t^{s+1}\|^2] \\ &\quad + \mathbb{E}[c_{t+1} \eta_t^2 \|v_t^{s+1}\|^2 + c_{t+1} \|x_t^{s+1} - \tilde{x}^s\|^2] \\ &\quad + 2c_{t+1} \eta_t \mathbb{E} \left[ \frac{1}{2\beta_t} \|\nabla f(x_t^{s+1})\|^2 + \frac{1}{2}\beta_t \|x_t^{s+1} - \tilde{x}^s\|^2 \right] \\ &\leq \mathbb{E}[f(x_t^{s+1}) - \left( \eta_t - \frac{c_{t+1}\eta_t}{\beta_t} \right) \|\nabla f(x_t^{s+1})\|^2 \\ &\quad + \left( \frac{L\eta_t^2}{2} + c_{t+1}\eta_t^2 \right) \mathbb{E}[\|v_t^{s+1}\|^2] \\ &\quad + (c_{t+1} + c_{t+1}\eta_t\beta_t) \mathbb{E}[\|x_t^{s+1} - \tilde{x}^s\|^2]]. \end{aligned} \quad (9)$$

To further bound this quantity, we use Lemma 3 to bound  $\mathbb{E}[\|v_t^{s+1}\|^2]$ , so that upon substituting it in Equation (9), we see that

$$\begin{aligned} R_{t+1}^{s+1} &\leq \mathbb{E}[f(x_t^{s+1})] \\ &\quad - \left( \eta_t - \frac{c_{t+1}\eta_t}{\beta_t} - \eta_t^2 L - 2c_{t+1}\eta_t^2 \right) \mathbb{E}[\|\nabla f(x_t^{s+1})\|^2] \\ &\quad + [c_{t+1}(1 + \eta_t\beta_t + 2\eta_t^2 L^2) + \eta_t^2 L^3] \mathbb{E}[\|x_t^{s+1} - \tilde{x}^s\|^2] \\ &\leq R_t^{s+1} - \left( \eta_t - \frac{c_{t+1}\eta_t}{\beta_t} - \eta_t^2 L - 2c_{t+1}\eta_t^2 \right) \mathbb{E}[\|\nabla f(x_t^{s+1})\|^2]. \end{aligned}$$

The second inequality follows from the definition of  $c_t$  and  $R_t^{s+1}$ , thus concluding the proof.  $\square$

## Proof of Theorem 2

**Theorem.** Let  $f \in \mathcal{F}_n$ . Let  $c_m = 0$ ,  $\eta_t = \eta > 0$ ,  $\beta_t = \beta > 0$ , and  $c_t = c_{t+1}(1 + \eta\beta + 2\eta^2 L^2) + \eta^2 L^3$  such that  $\Gamma_t > 0$  for  $0 \leq t \leq m-1$ . Define the quantity  $\gamma_n := \min_t \Gamma_t$ . Further, let  $p_i = 0$  for  $0 \leq i < m$  and  $p_m = 1$ , and let  $T$  be a multiple of  $m$ . Then for the output  $x_a$  of Algorithm 1 we have

$$\mathbb{E}[\|\nabla f(x_a)\|^2] \leq \frac{f(x^0) - f(x^*)}{T\gamma_n},$$

where  $x^*$  is an optimal solution to (1).

*Proof.* Since  $\eta_t = \eta$  for  $t \in \{0, \dots, m-1\}$ , using Lemma 1 and telescoping the sum, we obtain

$$\sum_{t=0}^{m-1} \mathbb{E}[\|\nabla f(x_t^{s+1})\|^2] \leq \frac{R_0^{s+1} - R_m^{s+1}}{\gamma_n}.$$

This inequality in turn implies that

$$\sum_{t=0}^{m-1} \mathbb{E}[\|\nabla f(x_t^{s+1})\|^2] \leq \frac{\mathbb{E}[f(\tilde{x}^s) - f(\tilde{x}^{s+1})]}{\gamma_n}, \quad (10)$$

where we used that  $R_m^{s+1} = \mathbb{E}[f(x_m^{s+1})] = \mathbb{E}[f(\tilde{x}^{s+1})]$  (since  $c_m = 0$ ,  $p_m = 1$ , and  $p_i = 0$  for  $i < m$ ), and that  $R_0^{s+1} = \mathbb{E}[f(\tilde{x}^s)]$  (since  $x_0^{s+1} = \tilde{x}^s$ , as  $p_m = 1$  and  $p_i = 0$  for  $i < m$ ). Now sum over all epochs to obtain

$$\frac{1}{T} \sum_{s=0}^{S-1} \sum_{t=0}^{m-1} \mathbb{E}[\|\nabla f(x_t^{s+1})\|^2] \leq \frac{f(x^0) - f(x^*)}{T\gamma_n}. \quad (11)$$

The above inequality used the fact that  $\tilde{x}^0 = x^0$ . Using the above inequality and the definition of  $x_a$  in Algorithm 1, we obtain the desired result.  $\square$

## Proof of Theorem 3

**Theorem.** Suppose  $f \in \mathcal{F}_n$ . Let  $\eta = \mu_0/(Ln^\alpha)$  ( $0 < \mu_0 < 1$  and  $0 < \alpha \leq 1$ ),  $\beta = L/n^{\alpha/2}$ ,  $m = \lfloor n^{3\alpha/2}/(3\mu_0) \rfloor$  and  $T$  is some multiple of  $m$ . Then there

exists universal constants  $\mu_0, \nu > 0$  such that we have the following:  $\gamma_n \geq \frac{\nu}{Ln^\alpha}$  in Theorem 2 and

$$\mathbb{E}[\|\nabla f(x_a)\|^2] \leq \frac{Ln^\alpha[f(x^0) - f(x^*)]}{T\nu},$$

where  $x^*$  is an optimal solution to the problem in (1) and  $x_a$  is the output of Algorithm 1.

*Proof.* For our analysis, we will require an upper bound on  $c_0$ . We observe that  $c_0 = \frac{\mu_0^2 L}{n^{2\alpha}} \frac{(1+\theta)^m - 1}{\theta}$  where  $\theta = 2\eta^2 L^2 + \eta\beta$ . This is obtained using the relation  $c_t = c_{t+1}(1 + \eta\beta + 2\eta^2 L^2) + \eta^2 L^3$  and the fact that  $c_m = 0$ . Using the specified values of  $\beta$  and  $\eta$  we have

$$\theta = 2\eta^2 L^2 + \eta\beta = \frac{2\mu_0^2}{n^{2\alpha}} + \frac{\mu_0}{n^{3\alpha/2}} \leq \frac{3\mu_0}{n^{3\alpha/2}}.$$

The above inequality follows since  $\mu_0 \leq 1$  and  $n \geq 1$ . Using the above bound on  $\theta$ , we get

$$\begin{aligned} c_0 &= \frac{\mu_0^2 L}{n^{2\alpha}} \frac{(1+\theta)^m - 1}{\theta} = \frac{\mu_0 L((1+\theta)^m - 1)}{2\mu_0 + n^{\alpha/2}} \\ &\leq \frac{\mu_0 L((1 + \frac{3\mu_0}{n^{3\alpha/2}})^{\lfloor n^{3\alpha/2}/(3\mu_0) \rfloor} - 1)}{2\mu_0 + n^{\alpha/2}} \\ &\leq n^{-\alpha/2}(\mu_0 L(e-1)), \end{aligned} \quad (12)$$

wherein the second inequality follows upon noting that  $(1 + \frac{1}{l})^l$  is increasing for  $l > 0$  and  $\lim_{l \rightarrow \infty} (1 + \frac{1}{l})^l = e$  (here  $e$  is the Euler's number). Now we can lower bound  $\gamma_n$ , as

$$\begin{aligned} \gamma_n &= \min_t \left( \eta - \frac{c_{t+1}\eta}{\beta} - \eta^2 L - 2c_{t+1}\eta^2 \right) \\ &\geq \left( \eta - \frac{c_0\eta}{\beta} - \eta^2 L - 2c_0\eta^2 \right) \geq \frac{\nu}{Ln^\alpha}, \end{aligned}$$

where  $\nu > 0$  is a universal constant. The first inequality holds since  $c_t$  decreases with  $t$ . The second inequality holds since (a)  $c_0/\beta$  is upper bounded by  $\mu_0(e-1)$  (follows from Equation (12)), (b)  $\eta^2 L \leq \mu_0\eta$  and (c)  $2c_0\eta^2 \leq 2\mu_0^2(e-1)\eta$  (follows from Equation (12)). By choosing a universal constant  $\mu_0$  appropriately, one can ensure that  $\gamma_n \geq \nu/(Ln^\alpha)$  for some universal constant  $\nu$ . For example, choosing  $\mu_0 = 1/4$ , we have  $\gamma_n \geq \nu/(Ln^\alpha)$  with  $\nu = 1/40$ . Substituting the above lower bound in Equation (11), we obtain the desired result.  $\square$

## Proof of Corollary 2

**Corollary.** Suppose  $f \in \mathcal{F}_n$ . Then the IFO complexity of Alg. 1 (with parameters from Thm. 3) for achieving an  $\epsilon$ -accurate solution is:

$$\text{IFO calls} = \begin{cases} O(n + (n^{1-\frac{\alpha}{2}}/\epsilon)), & \text{if } \alpha < 2/3, \\ O(n + (n^\alpha/\epsilon)), & \text{if } \alpha \geq 2/3. \end{cases}$$

*Proof.* This result follows from Theorem 3 and the fact that  $m = \lfloor n^{3\alpha/2}/(3\mu_0) \rfloor$ . Suppose  $\alpha < 2/3$ , then  $m = o(n)$  (little-o notation). However,  $n$  IFO calls are invested in calculating the average gradient at the end of each epoch. Thus,  $O(n)$  IFO calls are made for every  $m$  (inner) iterations of the algorithm. Using this relationship, we get an IFO complexity of  $O(n + (n^{1-\frac{\alpha}{2}}/\epsilon))$  in this case.

On the other hand, when  $\alpha \geq 2/3$ , the total number of IFO calls made by Alg. 1 in each epoch is  $\Omega(n)$  since  $m = \lfloor n^{3\alpha/2}/(3\mu_0) \rfloor$ . Hence, the oracle calls required for calculating the average gradient (per epoch) is of lower order, leading to  $O(n + (n^\alpha/\epsilon))$  IFO calls.  $\square$

### C. GD-SVRG: Convergence Rate

#### Proof of Theorem 4

**Theorem.** Suppose  $f \in \mathcal{F}_n$  is  $\tau$ -gradient dominated ( $\tau > n^{1/3}$ ). Then, the iterates of Algorithm 2 with  $T = \lceil 2L\tau n^{2/3}/\nu_1 \rceil$ ,  $m = \lfloor n/(3\mu_1) \rfloor$ ,  $\eta_t = \mu_1/(Ln^{2/3})$  for  $0 \leq t < m$ ,  $p_m = 1$  and  $p_i = 0$  for  $0 \leq i < m$  satisfy

$$\begin{aligned} \mathbb{E}[\|\nabla f(x^k)\|^2] &\leq 2^{-k} \mathbb{E}[\|\nabla f(x^0)\|^2], \\ \mathbb{E}[f(x^k) - f(x^*)] &\leq 2^{-k} [f(x^0) - f(x^*)]. \end{aligned}$$

Here  $\mu_1$  and  $\nu_1$  are the constants used in Corollary 3.

*Proof.* Note that Algorithm 2 uses SVRG as a subroutine. Using Corollary 3 (SVRG result), we observe that the iterates of Algorithm 2 satisfy the following:

$$\mathbb{E}[\|\nabla f(x^k)\|^2] \leq \frac{Ln^{2/3} \mathbb{E}[f(x^{k-1}) - f(x^*)]}{T\nu_1}.$$

Substituting the specified value of  $T$  in the above inequality, we have the following:

$$\begin{aligned} \mathbb{E}[\|\nabla f(x^k)\|^2] &\leq \frac{1}{2\tau} (\mathbb{E}[f(x^{k-1}) - f(x^*)]) \\ &\leq \frac{1}{2} \mathbb{E}[\|\nabla f(x^{k-1})\|^2]. \end{aligned}$$

The second inequality follows from  $\tau$ -gradient dominance of the function  $f$ . This completes the proof for the first part.

The proof of second part mimics that of the first part. Now we have the following condition on the iterates of Algorithm 2:

$$\mathbb{E}[\|\nabla f(x^k)\|^2] \leq \frac{\mathbb{E}[f(x^{k-1}) - f(x^*)]}{2\tau}. \quad (13)$$

However,  $f$  is  $\tau$ -gradient dominated, so  $\mathbb{E}[\|\nabla f(x^k)\|^2] \geq \mathbb{E}[f(x^k) - f(x^*)]/\tau$ , which combined with Equation (13) concludes the proof.  $\square$

### D. Convex SVRG: Convergence Rate

#### Proof of Theorem 5

**Theorem.** If  $f \in \mathcal{F}_n$  and  $f_i$  is convex ( $i \in [n]$ ),  $p_i = 1/m$  for  $0 \leq i < m$ , and  $p_m = 0$ . Then for Alg. 1, we have

$$\mathbb{E}[\|\nabla f(x_a)\|^2] \leq \frac{L\|x^0 - x^*\|^2 + 4mL^2\eta^2[f(x^0) - f(x^*)]}{T\eta(1 - 4L\eta)},$$

where  $x^*$  is optimal for (1) and  $x_a$  is the output of Alg. 1.

*Proof.* Consider the following sequence of inequalities:

$$\begin{aligned} \mathbb{E}[\|x_{t+1}^{s+1} - x^*\|^2] &= \mathbb{E}[\|x_t^{s+1} - \eta v_t^{s+1} - x^*\|^2] \\ &\leq \mathbb{E}[\|x_t^{s+1} - x^*\|^2] + \eta^2 \mathbb{E}[\|v_t^{s+1}\|^2] \\ &\quad - 2\eta \mathbb{E}[\langle v_t^{s+1}, x_t^{s+1} - x^* \rangle] \\ &\leq \mathbb{E}[\|x_t^{s+1} - x^*\|^2] + \eta^2 \mathbb{E}[\|v_t^{s+1}\|^2] \\ &\quad - 2\eta \mathbb{E}[f(x_t^{s+1}) - f(x^*)] \\ &\leq \mathbb{E}[\|x_t^{s+1} - x^*\|^2] - 2\eta(1 - 2L\eta) \mathbb{E}[f(x_t^{s+1}) - f(x^*)] \\ &\quad + 4L\eta^2 \mathbb{E}[f(\tilde{x}^s) - f(x^*)] \\ &= \mathbb{E}[\|x_t^{s+1} - x^*\|^2] - 2\eta(1 - 4L\eta) \mathbb{E}[f(x_t^{s+1}) - f(x^*)] \\ &\quad + 4L\eta^2 \mathbb{E}[f(\tilde{x}^s) - f(x^*)] - 4L\eta^2 \mathbb{E}[f(x_t^{s+1}) - f(x^*)]. \end{aligned}$$

The second inequality uses unbiasedness of the SVRG update and convexity of  $f$ . The third inequality follows from Lemma 8. Defining the Lyapunov function

$$P^s := \mathbb{E}[\|x_m^s - x^*\|^2] + 4mL\eta^2 \mathbb{E}[f(\tilde{x}^s) - f(x^*)],$$

and summing the above inequality over  $t$ , we get

$$2\eta(1 - 4L\eta) \sum_{t=0}^{m-1} \mathbb{E}[f(x_t^{s+1}) - f(x^*)] \leq P^s - P^{s+1}.$$

This due is to the fact that

$$\begin{aligned} P^{s+1} &= \mathbb{E}[\|x_m^{s+1} - x^*\|^2] + 4mL\eta^2 \mathbb{E}[f(\tilde{x}^{s+1}) - f(x^*)] \\ &= \mathbb{E}[\|x_m^{s+1} - x^*\|^2] + 4L\eta^2 \sum_{t=0}^{m-1} \mathbb{E}[f(x_t^{s+1}) - f(x^*)]. \end{aligned}$$

The above equality uses the fact that  $p_m = 0$  and  $p_i = 1/m$  for  $0 \leq i < m$ . Summing over all epochs and telescoping we then obtain

$$\mathbb{E}[f(x_a) - f(x^*)] \leq P^0 (2T\eta(1 - 4L\eta))^{-1}.$$

The inequality also uses the definition of  $x_a$  given in Alg 1. On this inequality we use Lemma 7, which yields

$$\begin{aligned} \mathbb{E}[\|\nabla f(x_a)\|^2] &\leq 2L\mathbb{E}[f(x_a) - f(x^*)] \\ &\leq \frac{L\|x^0 - x^*\|^2 + 4mL^2\eta^2[f(x^0) - f(x^*)]}{T\eta(1 - 4L\eta)}. \quad \square \end{aligned}$$

It is easy to see that we can obtain convergence rates for  $\mathbb{E}[f(x_a) - f(x^*)]$  from the above reasoning. This leads to a *direct* analysis of SVRG for convex functions.

**Algorithm 3** Mini-batch SVRG

---

1: **Input:**  $\tilde{x}^0 = x_m^0 = x^0 \in \mathbb{R}^d$ , epoch length  $m$ , step sizes  $\{\eta_i > 0\}_{i=0}^{m-1}$ ,  $S = \lceil T/m \rceil$ , discrete probability distribution  $\{p_i\}_{i=0}^m$ , mini-batch size  $b$

2: **for**  $s = 0$  **to**  $S - 1$  **do**

3:  $x_0^{s+1} = x_m^s$

4:  $g^{s+1} = \frac{1}{n} \sum_{i=1}^n \nabla f_i(\tilde{x}^s)$

5: **for**  $t = 0$  **to**  $m - 1$  **do**

6: Choose a mini-batch (uniformly random with replacement)  $I_t \subset [n]$  of size  $b$

7:  $u_t^{s+1} = \frac{1}{b} \sum_{i_t \in I_t} (\nabla f_{i_t}(x_t^{s+1}) - \nabla f_{i_t}(\tilde{x}^s)) + g^{s+1}$

8:  $x_{t+1}^{s+1} = x_t^{s+1} - \eta_t u_t^{s+1}$

9: **end for**

10:  $\tilde{x}^{s+1} = \sum_{i=0}^m p_i x_i^{s+1}$

11: **end for**

12: **Output:** Iterate  $x_a$  chosen uniformly random from  $\{\{x_t^{s+1}\}_{t=0}^{m-1}\}_{s=0}^{S-1}$ .

---

**E. Mini-batch Nonconvex SVRG****Proof of Theorem 6**

The proofs essentially follow along the lines of Lem. 1, Theorem 2 and Theorem 3 with the added complexity of mini-batch. We first prove few intermediate results before proceeding to the proof of Theorem 6.

**Lemma 2.** Let  $f \in \mathcal{F}_n$ . Suppose we have

$$\begin{aligned} \bar{R}_t^{s+1} &:= \mathbb{E}[f(x_t^{s+1}) + \bar{c}_t \|x_t^{s+1} - \tilde{x}^s\|^2], \\ \bar{c}_t &= \bar{c}_{t+1} (1 + \eta_t \beta_t + \frac{2\eta_t^2 L^2}{b}) + \frac{\eta_t^2 L^3}{b}, \end{aligned}$$

for  $0 \leq s \leq S - 1$  and  $0 \leq t \leq m - 1$  and the parameters  $\eta_t, \beta_t > 0$  and  $\bar{c}_{t+1}$  are chosen such that

$$\left( \eta_t - \frac{\bar{c}_{t+1} \eta_t}{\beta_t} - \eta_t^2 L - 2\bar{c}_{t+1} \eta_t^2 \right) > 0.$$

Then the iterates  $x_t^{s+1}$  in the mini-batch version of Alg. 1 i.e., Alg. 3 with mini-batch size  $b$  satisfy the bound:

$$\mathbb{E}[\|\nabla f(x_t^{s+1})\|^2] \leq \frac{\bar{R}_t^{s+1} - \bar{R}_{t+1}^{s+1}}{\left( \eta_t - \frac{\bar{c}_{t+1} \eta_t}{\beta_t} - \eta_t^2 L - 2\bar{c}_{t+1} \eta_t^2 \right)},$$

*Proof.* Using essentially the same argument as the proof of Lemma. 1 until Equation (9), we have

$$\begin{aligned} \bar{R}_{t+1}^{s+1} &\leq \mathbb{E}[f(x_t^{s+1}) - \left( \eta_t - \frac{\bar{c}_{t+1} \eta_t}{\beta_t} \right) \|\nabla f(x_t^{s+1})\|^2] \\ &\quad + \left( \frac{L\eta_t^2}{2} + \bar{c}_{t+1} \eta_t^2 \right) \mathbb{E}[\|u_t^{s+1}\|^2] \\ &\quad + (\bar{c}_{t+1} + \bar{c}_{t+1} \eta_t \beta_t) \mathbb{E}[\|x_t^{s+1} - \tilde{x}^s\|^2]. \end{aligned} \quad (14)$$

We use Lem. 4 in order to bound  $\mathbb{E}[\|u_t^{s+1}\|^2]$  in the above

inequality. Substituting it in Equation (14), we see that

$$\begin{aligned} \bar{R}_{t+1}^{s+1} &\leq \mathbb{E}[f(x_t^{s+1})] \\ &\quad - \left( \eta_t - \frac{\bar{c}_{t+1} \eta_t}{\beta_t} - \eta_t^2 L - 2\bar{c}_{t+1} \eta_t^2 \right) \mathbb{E}[\|\nabla f(x_t^{s+1})\|^2] \\ &\quad + \left[ \bar{c}_{t+1} (1 + \eta_t \beta_t + \frac{2\eta_t^2 L^2}{b}) + \frac{\eta_t^2 L^3}{b} \right] \mathbb{E}[\|x_t^{s+1} - \tilde{x}^s\|^2] \\ &\leq \bar{R}_t^{s+1} - \left( \eta_t - \frac{\bar{c}_{t+1} \eta_t}{\beta_t} - \eta_t^2 L - 2\bar{c}_{t+1} \eta_t^2 \right) \mathbb{E}[\|\nabla f(x_t^{s+1})\|^2]. \end{aligned}$$

The second inequality follows from the definition of  $\bar{c}_t$  and  $\bar{R}_t^{s+1}$ , thus concluding the proof.  $\square$

Our intermediate key result is the following theorem that provides convergence rate of mini-batch SVRG.

**Theorem 8.** Let  $f \in \mathcal{F}_n$  and  $\bar{\gamma}_n$  denote the following:

$$\bar{\gamma}_n := \min_{0 \leq t \leq m-1} \left( \eta - \frac{\bar{c}_{t+1} \eta}{\beta} - \eta^2 L - 2\bar{c}_{t+1} \eta^2 \right).$$

Let  $\eta_t = \eta > 0$  and  $\beta_t = \beta > 0$  for all  $t \in \{0, \dots, m-1\}$ ,  $\bar{c}_m = 0$ ,  $\bar{c}_t = \bar{c}_{t+1} (1 + \eta_t \beta_t + \frac{2\eta_t^2 L^2}{b}) + \frac{\eta_t^2 L^3}{b}$  for  $t \in \{0, \dots, m-1\}$  such that  $\bar{\gamma}_n > 0$ . Further, let  $p_m = 1$  and  $p_i = 0$  for  $0 \leq i < m$ . Then for the output  $x_a$  of mini-batch version of Alg. 1 i.e., Alg. 3 with mini-batch size  $b$ , we have

$$\mathbb{E}[\|\nabla f(x_a)\|^2] \leq \frac{f(x^0) - f(x^*)}{T \bar{\gamma}_n},$$

where  $x^*$  is an optimal solution to (1).

*Proof.* Since  $\eta_t = \eta$  for  $t \in \{0, \dots, m-1\}$ , using Lem. 2 and telescoping the sum, we obtain

$$\sum_{t=0}^{m-1} \mathbb{E}[\|\nabla f(x_t^{s+1})\|^2] \leq \frac{\bar{R}_0^{s+1} - \bar{R}_m^{s+1}}{\bar{\gamma}_n}.$$

This inequality in turn implies that

$$\sum_{t=0}^{m-1} \mathbb{E}[\|\nabla f(x_t^{s+1})\|^2] \leq \frac{\mathbb{E}[f(\tilde{x}^s) - f(\tilde{x}^{s+1})]}{\bar{\gamma}_n},$$

where we used that  $\bar{R}_m^{s+1} = \mathbb{E}[f(x_m^{s+1})] = \mathbb{E}[f(\tilde{x}^{s+1})]$  (since  $\bar{c}_m = 0$ ,  $p_m = 1$ , and  $p_i = 0$  for  $i < m$ ), and that  $\bar{R}_0^{s+1} = \mathbb{E}[f(\tilde{x}^s)]$  (since  $x_0^{s+1} = \tilde{x}^s$ , as  $p_m = 1$  and  $p_i = 0$  for  $i < m$ ). Now sum over all epochs and using the fact that  $\tilde{x}^0 = x^0$ , we get the desired result.  $\square$

We now present the proof of Theorem 6.

**Theorem.** Let  $f \in \mathcal{F}_n$  and  $\bar{\gamma}_n$  denote the following:

$$\bar{\gamma}_n := \min_{0 \leq t \leq m-1} \left( \eta - \frac{\bar{c}_{t+1} \eta}{\beta} - \eta^2 L - 2\bar{c}_{t+1} \eta^2 \right),$$

where  $\bar{c}_m = 0$ ,  $\bar{c}_t = \bar{c}_{t+1} (1 + \eta \beta + 2\eta^2 L^2/b) + \eta^2 L^3/b$  for  $0 \leq t < m$ . Suppose  $\eta = \mu_2 b / (Ln^{2/3})$  ( $0 < \mu_2 < 1$ ),

$\beta = L/n^{1/3}$ ,  $m = \lfloor n/(3b\mu_2) \rfloor$  and  $T$  is some multiple of  $m$ . Then for  $b < n^{2/3}$ , there exists universal constants  $\mu_2, \nu_2 > 0$  such that:  $\bar{\gamma}_n \geq \frac{\nu_2 b}{Ln^{2/3}}$  and

$$\mathbb{E}[\|\nabla f(x_a)\|^2] \leq \frac{Ln^{2/3}[f(x^0) - f(x^*)]}{bT\nu_2},$$

where  $x^*$  is optimal for (1) and  $x_a$  is the output of the mini-batch version of Alg. 1.

*Proof of Theorem 6.* We first observe that using the specified values of  $\beta$  and  $\eta$  we obtain

$$\bar{\theta} := \frac{2\eta^2 L^2}{b} + \eta\beta = \frac{2\mu_2^2 b}{n^{4/3}} + \frac{\mu_2 b}{n} \leq \frac{3\mu_2 b}{n}.$$

The above inequality follows since  $\mu_2 \leq 1$  and  $n \geq 1$ . For our analysis, we will require the following bound on  $\bar{c}_0$ :

$$\begin{aligned} \bar{c}_0 &= \frac{\mu_2^2 b^2 L}{bn^{4/3}} \frac{(1 + \bar{\theta})^m - 1}{\bar{\theta}} = \frac{\mu_2 b L((1 + \bar{\theta})^m - 1)}{2b\mu_2 + bn^{1/3}} \\ &\leq n^{-1/3}(\mu_2 L(e - 1)), \end{aligned} \quad (15)$$

wherein the first equality holds due to the relation  $\bar{c}_t = \bar{c}_{t+1}(1 + \eta_t \beta_t + \frac{2\eta_t^2 L^2}{b}) + \frac{\eta_t^2 L^3}{b}$ , and the inequality follows upon again noting that  $(1 + 1/l)^l$  is increasing for  $l > 0$  and  $\lim_{l \rightarrow \infty} (1 + 1/l)^l = e$ . Now we can lower bound  $\bar{\gamma}_n$ , as

$$\begin{aligned} \bar{\gamma}_n &= \min_t \left( \eta - \frac{\bar{c}_{t+1}\eta}{\beta} - \eta^2 L - 2\bar{c}_{t+1}\eta^2 \right) \\ &\geq \left( \eta - \frac{\bar{c}_0\eta}{\beta} - \eta^2 L - 2\bar{c}_0\eta^2 \right) \geq \frac{b\nu_2}{Ln^{2/3}}, \end{aligned}$$

where  $\nu_2 > 0$  is a universal constant. The first inequality holds since  $\bar{c}_t$  decreases with  $t$ . The second one holds since (a)  $\bar{c}_0/\beta$  is upper bounded by  $\mu_2(e - 1)$  (due to Equation (15)), (b)  $\eta^2 L \leq \mu_2\eta$  (as  $b < n^{2/3}$ ) and (c)  $2\bar{c}_0\eta^2 \leq 2\mu_2^2(e - 1)\eta$  (again due to Equation (15) and the fact  $b < n^{2/3}$ ). By choosing an appropriately small universal constant  $\mu_2$ , one can ensure that  $\bar{\gamma}_n \geq b\nu_2/(Ln^{2/3})$  for some universal constant  $\nu_2$ . For example, choosing  $\mu_2 = 1/4$ , we have  $\bar{\gamma}_n \geq b\nu_2/(Ln^{2/3})$  with  $\nu_2 = 1/40$ . Substituting the above lower bound in Theorem 8, we get the desired result.  $\square$

## F. MSVRG: Convergence Rate

### Proof of Theorem 7

**Theorem.** Suppose  $f \in \mathcal{F}_n$  has  $\sigma$ -bounded gradients. Let  $\eta_t = \eta = \max\{c/\sqrt{T}, \mu_1/(Ln^{2/3})\}$  ( $\mu_1$  is the constant from Corr. 3),  $m = \lfloor n/(3\mu_1) \rfloor$ , and  $c = \sqrt{\frac{f(x^0) - f(x^*)}{2L\sigma^2}}$ . Further, let  $T$  be a multiple of  $m$ ,  $p_m = 1$ , and  $p_i = 0$  for  $0 \leq i < m$ . Then, the output  $x_a$  of Alg. 1 satisfies

$$\begin{aligned} \mathbb{E}[\|\nabla f(x_a)\|^2] &\leq \bar{\nu} \min \left\{ 2\sqrt{\frac{2(f(x^0) - f(x^*))L}{T}}\sigma, \frac{Ln^{2/3}[f(x^0) - f(x^*)]}{T\nu_1} \right\}, \end{aligned}$$

where  $\bar{\nu} > 0$  is a universal constant,  $\nu_1$  is the universal constant from Corr. 3 and  $x^*$  is an optimal solution to (1).

*Proof.* First, we observe that the step size  $\eta$  is chosen to be  $\max\{c/\sqrt{T}, \mu_1/(Ln^{2/3})\}$  where

$$c = \sqrt{\frac{f(x^0) - f(x^*)}{2L\sigma^2}}.$$

Suppose  $\eta = \mu_1/(Ln^{2/3})$ , we obtain the convergence rate in Corollary 3. Now, let's consider the case where  $\eta = c/\sqrt{T}$ . In this case, we have the following bound:

$$\begin{aligned} \mathbb{E}[\|v_t^{s+1}\|^2] &= \mathbb{E}[\|\nabla f_{i_t}(x_t^{s+1}) - \nabla f_{i_t}(\tilde{x}^s) + \nabla f(\tilde{x}^s)\|^2] \\ &\leq 2(\mathbb{E}[\|\nabla f_{i_t}(x_t^{s+1})\|^2] + \|\nabla f_{i_t}(\tilde{x}^s) - \nabla f(\tilde{x}^s)\|^2) \\ &\leq 2(\mathbb{E}[\|\nabla f_{i_t}(x_t^{s+1})\|^2] + \|\nabla f_{i_t}(\tilde{x}^s)\|^2) \leq 4\sigma^2. \end{aligned}$$

The first inequality follows from Lemma 6 with  $r = 2$ . The second inequality follows from (a)  $\sigma$ -bounded gradient property of  $f$  and (b) the fact that for a random variable  $\zeta$ ,  $\mathbb{E}[\|\zeta - \mathbb{E}[\zeta]\|^2] \leq \mathbb{E}[\|\zeta\|^2]$ . The rest of the proof is along exactly the lines as in Theorem 1. This provides a convergence rate similar to Theorem 1. More specifically, using step size  $c/\sqrt{T}$ , we get

$$\mathbb{E}[\|f(x_a)\|^2] \leq 2\sqrt{\frac{2(f(x^0) - f(x^*))L}{T}}\sigma. \quad (16)$$

The only thing that remains to be proved is that with the step size choice of  $\max\{c/\sqrt{T}, \mu_1/(Ln^{2/3})\}$ , the minimum of two bounds hold. Consider the case  $c/\sqrt{T} > \mu_1/(Ln^{2/3})$ . In this case, we have the following:

$$\begin{aligned} \frac{2\sqrt{\frac{2(f(x^0) - f(x^*))L}{T}}\sigma}{\frac{Ln^{2/3}[f(x^0) - f(x^*)]}{T\nu_1}} &= \frac{2\nu_1\sigma\sqrt{2LT}}{Ln^{2/3}\sqrt{f(x^0) - f(x^*)}} \\ &\leq 2\nu_1/\mu_1 \leq \bar{\nu} := \max \left\{ \frac{2\nu_1}{\mu_1}, \frac{\mu_1}{2\nu_1} \right\}, \end{aligned}$$

where  $\nu_1$  is the constant in Corollary 3. This inequality holds since  $c/\sqrt{T} > \mu_1/(Ln^{2/3})$ . Rearranging the above inequality, we have

$$2\sqrt{\frac{2(f(x^0) - f(x^*))L}{T}}\sigma \leq \frac{\bar{\nu}Ln^{2/3}[f(x^0) - f(x^*)]}{T}$$

in this case. Note that the left hand side of the above inequality is precisely the bound obtained by using step size  $c/\sqrt{T}$  (see Equation (16)). Similarly, when  $c/\sqrt{T} \leq \mu_1/(Ln^{2/3})$ , the inequality holds in the other direction. Using these two observations, we have the desired result.  $\square$

## G. Key Lemmata

**Lemma 3.** For the intermediate iterates  $v_t^{s+1}$  computed by Alg. 1, we have the following:

$$\mathbb{E}[\|v_t^{s+1}\|^2] \leq 2\mathbb{E}[\|\nabla f(x_t^{s+1})\|^2] + 2L^2\mathbb{E}[\|x_t^{s+1} - \tilde{x}^s\|^2].$$



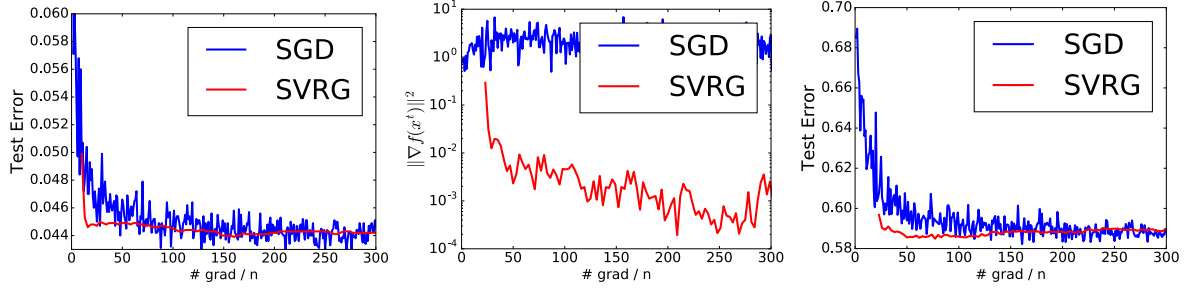

Figure 2. Neural network results for MNIST and STL-10. The leftmost result is for MNIST. The remaining two plots are of STL-10.

*Proof.* The proof simply follows from the proof of Lemma 4 with  $I_t = \{i_t\}$ .  $\square$

We now present a result to bound the variance of mini-batch SVRG.

**Lemma 4.** *Let  $u_t^{s+1}$  be computed by the mini-batch version of Alg. 1 i.e., Alg. 3 with mini-batch size  $b$ . Then,*

$$\mathbb{E}[\|u_t^{s+1}\|^2] \leq 2\mathbb{E}[\|\nabla f(x_t^{s+1})\|^2] + \frac{2L^2}{b}\mathbb{E}[\|x_t^{s+1} - \tilde{x}^s\|^2].$$

*Proof.* For the ease of exposition, we use the following notation:

$$\zeta_t^{s+1} = \frac{1}{|I_t|} \sum_{i_t \in I_t} (\nabla f_{i_t}(x_t^{s+1}) - \nabla f_{i_t}(\tilde{x}^s)).$$

We use the definition of  $u_t^{s+1}$  to get

$$\begin{aligned} \mathbb{E}[\|u_t^{s+1}\|^2] &= \mathbb{E}[\|\zeta_t^{s+1} + \nabla f(\tilde{x}^s)\|^2] \\ &= \mathbb{E}[\|\zeta_t^{s+1} + \nabla f(\tilde{x}^s) - \nabla f(x_t^{s+1}) + \nabla f(x_t^{s+1})\|^2] \\ &\leq 2\mathbb{E}[\|\nabla f(x_t^{s+1})\|^2] + 2\mathbb{E}[\|\zeta_t^{s+1} - \mathbb{E}[\zeta_t^{s+1}]\|^2] \\ &= 2\mathbb{E}[\|\nabla f(x_t^{s+1})\|^2] \\ &\quad + \frac{2}{b^2}\mathbb{E}\left[\left\|\sum_{i_t \in I_t} (\nabla f_{i_t}(x_t^{s+1}) - \nabla f_{i_t}(\tilde{x}^s) - \mathbb{E}[\zeta_t^{s+1}])\right\|^2\right] \end{aligned}$$

The first inequality follows from Lemma 6 (with  $r = 2$ ) and the fact that  $\mathbb{E}[\zeta_t^{s+1}] = \nabla f(x_t^{s+1}) - \nabla f(\tilde{x}^s)$ . From the above inequality, we get

$$\begin{aligned} \mathbb{E}[\|u_t^{s+1}\|^2] &\leq 2\mathbb{E}[\|\nabla f(x_t^{s+1})\|^2] \\ &\quad + \frac{2}{b^2}\mathbb{E}\left[\sum_{i_t \in I_t} \|\nabla f_{i_t}(x_t^{s+1}) - \nabla f_{i_t}(\tilde{x}^s)\|^2\right] \\ &\leq 2\mathbb{E}[\|\nabla f(x_t^{s+1})\|^2] + \frac{2L^2}{b}\mathbb{E}[\|x_t^{s+1} - \tilde{x}^s\|^2] \end{aligned}$$

The first inequality follows from Lemma 5 and noting that for a random variable  $\zeta$ ,  $\mathbb{E}[\|\zeta - \mathbb{E}[\zeta]\|^2] \leq \mathbb{E}[\|\zeta\|^2]$ . The last inequality follows from  $L$ -smoothness of  $f_{i_t}$ .  $\square$

## H. Experiments

Figure 2 shows the remaining plots for MNIST and STL-10 datasets. As seen in the plots, there is no significant difference in the test error of SVRG and SGD for these datasets.

## I. Other Lemmas

**Lemma 5.** *For random variables  $z_1, \dots, z_r$  are independent and mean 0, we have*

$$\mathbb{E}[\|z_1 + \dots + z_r\|^2] = \mathbb{E}[\|z_1\|^2 + \dots + \|z_r\|^2].$$

*Proof.* We have the following:

$$\begin{aligned} \mathbb{E}[\|z_1 + \dots + z_r\|^2] &= \sum_{i,j=1}^r \mathbb{E}[z_i z_j] = \mathbb{E}[\|z_1\|^2 + \dots + \|z_r\|^2]. \end{aligned}$$

The second equality follows from the fact that  $z_i$ 's are independent and mean 0.  $\square$

**Lemma 6.** *For random variables  $z_1, \dots, z_r$ , we have*

$$\mathbb{E}[\|z_1 + \dots + z_r\|^2] \leq r\mathbb{E}[\|z_1\|^2 + \dots + \|z_r\|^2].$$

We need the next lemma (Lemma 7) for our results in the convex case.

**Lemma 7 (Johnson & Zhang (2013)).** *Let  $g : \mathbb{R}^d \rightarrow \mathbb{R}$  be convex with  $L$ -Lipschitz continuous gradient. Then,*

$$\|\nabla g(x) - \nabla g(y)\|^2 \leq 2L[g(x) - g(y) - \langle \nabla g(y), x - y \rangle],$$

for all  $x, y \in \mathbb{R}^d$ .

*Proof.* Consider  $h(x) := g(x) - g(y) - \langle \nabla g(y), x - y \rangle$  for arbitrary  $y \in \mathbb{R}^d$ . Observe that  $\nabla h$  is also  $L$ -Lipschitz continuous. Note that  $h(x) \geq 0$  (since  $h(y) = 0$  and  $\nabla h(y) = 0$ , or alternatively since  $h$  defines a Bregman

divergence), from which it follows that

$$\begin{aligned}
 0 &\leq \min_{\rho} [h(x - \rho \nabla h(x))] \\
 &\leq \min_{\rho} [h(x) - \rho \|\nabla h(x)\|^2 + \frac{L\rho^2}{2} \|\nabla h(x)\|^2] \\
 &= h(x) - \frac{1}{2L} \|\nabla h(x)\|^2.
 \end{aligned}$$

Rewriting in terms of  $g$  we obtain the required result.  $\square$

Lemma 8 bounds the variance of SVRG for the convex case. Please refer to (Johnson & Zhang, 2013) for more details.

**Lemma 8** ((Johnson & Zhang, 2013)). *Suppose  $f_i$  is convex for all  $i \in [n]$ . For the updates in Alg. 1 we have the following inequality:*

$$\mathbb{E}[\|v_t^{s+1}\|^2] \leq 4L[f(x_t^{s+1}) - f(x^*) + f(\tilde{x}^s) - f(x^*)].$$

*Proof.* The proof follows upon observing the following:

$$\begin{aligned}
 \mathbb{E}[\|v_t^{s+1}\|^2] &= \mathbb{E}[\|\nabla f_{i_t}(x_t^{s+1}) - \nabla f_{i_t}(x_0^{s+1}) + \nabla f(\tilde{x}^s)\|^2] \\
 &\leq 2\mathbb{E}[\|\nabla f_{i_t}(x_t^{s+1}) - \nabla f_{i_t}(x^*)\|^2] \\
 &\quad + 2\mathbb{E}[\|\nabla f_{i_t}(\tilde{x}^s) - \nabla f_{i_t}(x^*) - (\nabla f(\tilde{x}^s) - \nabla f(x^*))\|^2] \\
 &\leq 2\mathbb{E}[\|\nabla f_{i_t}(x_t^{s+1}) - \nabla f_{i_t}(x^*)\|^2] \\
 &\quad + 2\mathbb{E}[\|\nabla f_{i_t}(\tilde{x}^s) - \nabla f_{i_t}(x^*)\|^2] \\
 &\leq 4L[f(x_t^{s+1}) - f(x^*) + f(\tilde{x}^s) - f(x^*)].
 \end{aligned}$$

The first inequality follows from Cauchy-Schwarz and Young inequality; the second one from  $\mathbb{E}[\|\xi - \mathbb{E}[\xi]\|^2] \leq \mathbb{E}[\|\xi\|^2]$ , and the third one from Lemma 7.  $\square$
